# Supplementary material for: Minimizing the variables of voiding spot assay for comparison between laboratories
Source: PeerJ. 2023 May 23;11:e15420. doi: 10.7717/peerj.15420 (PMC10215753; doi:10.7717/peerj.15420)
Supplement: Supplemental Information 1 [file peerj-11-15420-s001.xlsx]

## Sheet: Fig_1 total area
	FIJI	Matlab
Image label	total area(mm2)	total area(mm2)
1	983.425	982.211
2	1185.97	1194.95
3	1520.72	1508.94
4	1184.97	1180.6
5	1116.71	1119.15
6	1244.84	1240.54
7	900.739	899.064
8	890.344	920.604
9	1644.85	1637.08
10	1449.21	1416.77
11	1847.34	1849.06
12	894.601	902.214
13	2026.53	2041.02
14	1371.04	1362.54
15	1445.07	1460.95
16	812.543	822.153
17	816.371	826.647
18	1100.14	1111.61
19	817.312	818.44
20	2010	2016.83

## Sheet: Fig_1 PVS size
	FIJI	Matlab
Image label	PVS size(mm2)	PVS size(mm2)
1	955.53	954.41
2	1185.97	1185.86
3	355.535	353.729
4	1004.93	1005.18
5	1091.64	1092.08
6	588.716	587.419
7	867.831	866.758
8	775.693	774.178
9	1308.57	1307.93
10	478.603	467.555
11	375	376.497
12	883.889	884.231
13	370.245	356.107
14	258.203	256.713
15	228.767	229.185
16	761.918	762.377
17	755.926	755.349
18	908.363	907.271
19	787.996	788.695
20	904.887	908.021

## Sheet: Fig_1 SVS size 
	FIJI	Matlab
Image label	PVS size(mm2)	PVS size(mm2)
1	13.9474	13.9007
2	0	3.02833
3	5.79869	6.26842
4	10.5908	10.3189
5	5.01473	5.41563
6	67.4035	65.7
7	16.454	16.1532
8	6.03426	7.32128
9	16.0136	14.9618
10	6.69912	4.70319
11	14.4727	14.2944
12	5.35603	5.99415
13	9.73882	10.4194
14	3.20107	3.43388
15	4.83074	5.36508
16	5.06257	5.97759
17	5.03712	5.94148
18	10.0936	10.7546
19	14.658	14.8729
20	11.7778	10.5677

## Sheet: Fig_1 PVS number
Image label	FIJI	Matlab
1	1	1
2	1	1
3	4	4
4	1	1
5	1	1
6	2	2
7	1	1
8	1	1
9	1	1
10	3	3
11	4	4
12	1	1
13	5	5
14	5	5
15	6	6
16	1	1
17	1	1
18	1	1
19	1	1
20	2	2

## Sheet: Fig_1- regression
Measured variables		Passing-Bablok regression			Bland-Altman plot
		Intercept (95%CI)	Slope (95%CI)	Residual standard deviation (95%CI)	Bias (95%CI)	Lower limit of agreement (95%CI)	Upper limit of agreement (95%CI)
Total area (mm2)	Fiji/Matlab	14.78 (-24.19 to 39.65)	0.99 (0.97 to 1.028)	21.75 (42.63 to 42.63)	-11.10 (-24.03 to 1.82)	-65.24 (-87.76 to -42.77)	43.03 (20.56 to 65.50)
PVS size (mm2)		-1.66 (-3.52 to 0.38)	1.00 (0.99 to 1.00)	4.95 (-9.70 to 9.69)	-0.31 (-3.49 to 2.86)	-13.60 (-19.12 to -8.09)	12.98 (7.46 to 18.50)
PVS number		0.00 (0.00-0.00)	1.00 (1.00-1.00)	0.00 (0.00-0.00)	0.00 (0.00 to 0.00)	0.00 (0.00 to 0.00)	0.00 (0.00 to 0.00)
Minor spots size (mm2)		0.95 (0.57 to 1.95)	0.9321 (0.85 to 0.97)	1.2795 (-2.51 to 2.51)	-0.62 (-1.47 to 0.23)	-4.18 (-5.65 to -2.70)	2.93 (1.46 to 4.40)

## Sheet: Fig2(D) 
Total volume (μl)
Image label	standard clear	big opaque	small opaque
1	371.649	325.632	356.797
2	631.096	956.429	577.697
3	625.662	372.21	586.745
4	470.131	399.96	767.901
5	400.79	403.504	1230.84
6	1369.39	424.63	698.903
7	1104.74	427.144	635.538
8	602.073	447.991	589.918
9	1089.49	450.663	212.978
10	449.653	482.923	501.06
11	1013.09	505.167	857.78
12	831.771	544.606	780.664
13	895.03	552.003	565.016
14	753.551	557.22	457.201
15	941.104	566.81	577.716
16	606.325	575.662	549.476
17	541.444	594.358	974.412
18	731.155	594.627	1113.58
19	392.13	603.387	1132.73
20	703.267	584.928	628.182
21	731.455	644.014	755.58
22	902.138	676.33	863.627
23	677.077	698.794	865.122
24	1311.14	709.051	761.683
25	614.59	733.684	1306.73
26	713.4	924.899	1132.79
27	954.64	944.547	885.042
28	568.202	1067.81	861.252
29	589.129	1128.95	734.834
30	391.211	1193.57	463.173

## Sheet: Fig2(E) 
Total volume (%Total mice)
Bin center	standard clear	big opaque	small opaque
0-300	0	0	3.33333
301-500	20	30	10
501-700	30	43.3333	33.3333
701-900	23.3333	6.66667	33.3333
901-1100	16.6667	13.3333	3.33333
1101-1300	3.33333	6.66667	13.3333
1301-1500	6.66667	0	3.33333

## Sheet: Fig2(F)
Total spot number
Image label	standard clear	big opaque	small opaque
1	12	13	6
2	9	24	13
3	14	13	16
4	6	9	19
5	9	16	6
6	7	15	5
7	9	6	10
8	11	12	8
9	13	12	12
10	8	8	14
11	13	3	13
12	8	11	11
13	9	12	15
14	11	5	6
15	6	13	9
16	8	6	6
17	9	11	4
18	7	13	8
19	6	10	9
20	9	5	11
21	14	10	11
22	5	17	6
23	8	13	7
24	6	6	13
25	4	6	13
26	11	6	13
27	11	7	7
28	7	5	10
29	12	2	12
30	12	8	11

## Sheet: Fig2(G)
Total spot number(%Total mice)
Bin center	standard clear	big opaque	small opaque
1-5	6.66667	16.6667	6.66667
6-10	56.6667	36.6667	43.3333
11-15	36.6667	36.6667	43.3333
16-20	0	6.66667	6.66667
21-25	0	3.33333	0

## Sheet: Fig2(H)
PVS volume（μL）
standard clear	big opaque	small opaque
21.9711	20.2371	20.7861
22.6236	27.3028	25.3504
25.4593	30.4037	29.4509
30.1434	35.1549	33.2066
30.6426	36.41	35.6361
31.6429	36.5795	35.8795
38.023	37.1439	36.7675
40.261	37.7777	43.4361
41.0402	38.6842	45.2842
42.4135	39.7339	47.7634
43.5895	40.6001	48.3802
44.2944	41.55	50.4762
45.5351	41.6076	56.1821
45.6448	43.4979	57.4289
47.0359	45.0551	57.6644
47.4368	46.7574	59.5004
51.0704	47.0897	62.072
51.2916	47.6523	63.2268
53.1193	47.6745	63.3345
53.4464	50.5964	63.6099
54.1683	51.5372	64.1898
54.8314	51.6318	65.1871
57.5189	51.6744	67.8675
58.6994	52.0432	68.0484
58.8629	52.4016	68.4139
59.0984	53.7674	68.7183
59.4352	54.9482	68.9625
60.373	55.0277	69.3004
60.7619	56.7887	71.6116
60.8406	57.2202	72.2306
60.9032	57.9658	72.2962
61.1681	58.0596	72.5351
62.197	58.6195	72.6933
64.3172	58.7676	73.8983
65.1559	59.8143	75.0979
65.8868	60.0321	75.9735
66.0259	62.0704	77.7086
67.9078	62.9562	77.9215
70.1576	63.8922	78.1645
70.1697	64.4065	79.8517
70.291	66.5695	81.1836
72.2721	67.0541	81.3034
72.838	68.1837	81.3905
72.9812	68.2797	81.4579
74.5727	68.7669	81.6531
75.1552	69.1972	82.6738
75.2204	71.2955	85.6379
76.0719	71.3102	85.8109
76.0964	71.6003	86.5203
78.7715	71.7144	87.11
79.016	72.0958	87.6491
79.2074	72.3128	87.8568
80.6192	73.8779	87.888
81.0133	74.7079	87.8925
82.4006	74.931	91.4776
84.237	75.0056	91.7824
84.361	75.6683	94.1682
85.6085	75.8051	95.8678
86.038	75.9174	97.2875
86.3154	76.6303	99.0418
86.8391	77.3288	99.9174
87.1439	77.6152	103.74
87.2426	78.2704	108.49
87.749	78.4109	108.776
88.4193	78.7383	109.196
88.9641	78.834	109.673
89.5361	78.9237	110.235
91.1739	79.695	110.557
91.6287	80.487	110.971
92.4433	80.8864	111.321
94.5265	81.2368	111.728
95.8147	81.3287	112.059
95.8784	82.4191	112.824
100.997	83.228	114.975
102.154	84.5562	115.348
102.251	85.1707	115.764
102.568	85.2201	115.985
103.228	85.8154	119.774
106.019	86.8474	119.789
106.855	87.1111	120.949
108.797	87.1409	122.475
110.021	87.1767	122.939
110.33	88.2972	128.963
112.474	88.5478	129.28
113.82	88.8383	132.022
114.135	89.1943	132.999
116.937	89.9611	133.072
119.11	91.637	133.528
120.996	91.7508	133.862
120.996	92.3197	134.019
122.115	93.7104	134.401
123.463	93.8539	137.705
123.919	96.815	138.152
124.184	98.2852	140.394
125.765	98.4725	141.93
126.218	100.18	142.687
127.222	102.483	143.387
129.334	103.452	146.627
130.538	103.476	147.354
130.742	103.511	147.914
130.861	104.993	148.475
130.998	105.302	150.696
131.436	105.483	150.862
131.462	105.706	152.021
132.456	108.366	153.511
135.178	118.555	158.786
140.926	118.769	160.205
143.871	122.5	160.869
144.732	125.152	163.185
144.804	125.62	164.639
144.929	127.864	166.632
151.309	130.496	168.419
151.721	131.283	168.982
151.97	133.735	171.802
155.867	135.75	186.11
158.211	137.327	194.183
158.465	138.47	199.068
159.139	140.209	203.627
164.666	140.937	205.357
165.575	147.586	215.249
166.656	148.764	215.405
167.556	153.201	218.953
168.757	158.023	224.061
169.804	159.911	233.273
175.056	170.2	240.079
175.695	171.147	257.261
175.747	183.27	261.396
179.386	184.253	262.585
182.262	187.548	264.644
183.138	194.75	286.139
185.56	199.518	298.885
188.668	200.967	320.922
188.941	201.232	328.255
192.537	209.174	360.366
195.395	209.754	378.645
199.622	217.718	392.289
200.256	221.297	418.12
203.013	229.068	431.757
206.212	231.478	455.586
206.939	233.599	460.972
207.873	233.628	465.449
209.246	241.198	123.487
209.486	242.827	289.495
216.256	243.348	126.401
218.844	243.388	142.647
221.347	246.025	332.345
221.87	274.116	216.461
235.177	280.462	99.3941
238.904	281.794	174.41
247.649	281.872	212.1
251.515	286.204	111.501
252.79	298.259	101.497
260.562	301.477	161.153
269.617	310.22	530.659
289.879	318.937	180.887
296.751	325.512	101.712
297.836	401.473
304.202	435.592
314.598	456.501
326.372
352.34
439.612
443.749
446.083

[truncated: 31 more sheets: Fig2(I) , Fig2(J) , Fig2(K), Fig2(L) , Fig3(C) , Fig3(D), Fig3(E), Fig3(F), Fig3(G) , Fig3(H) , Fig3(I) , Fig3(J) , Fig3(K) , Fig4(F) , Fig4(G) , Fig4(H) , Fig4(I) , Fig4(J), Fig4(K) , Fig4(L)  …]
